# Supplementary material for: Investigation of the effects of metal ions in sample buffer on capillary electrophoresis coupled with laser-induced fluorescence analysis of thrombin using a dye-labeled 29-mer DNA aptamer
Source: Royal Society of Chemistry journal article supplement (doi:10.1039/c7ay01791j), 2017-01-01
Supplement: c7ay01791j1.pdf [file c7ay01791j1.pdf]

## Supplementary Material

### **Investigation of Effects of Metal Ions in Sample Buffer on Capillary Electrophoresis Coupled with Laser-Induced Fluorescence Analysis of Thrombin Using Dye-Labeled 29-mer DNA Aptamer**

Yunlong Bai <sup>a, b</sup>, Qiang Zhao <sup>b, c</sup> \*

a. Institute of Environmental Science, Shanxi University, Taiyuan, 030006, PR China

b. State Key Laboratory of Environmental Chemistry and Eco-toxicology, Research Center for Eco-Environmental Sciences, Chinese Academy of Sciences, Beijing, 100085, PR China.

c. University of Chinese Academy of Sciences, Beijing 100049, China.

\*Corresponding author

E-mail: qiangzhao@rcees.ac.cn

Tel: +86-10-62849892. Fax: +86-10-62849892.

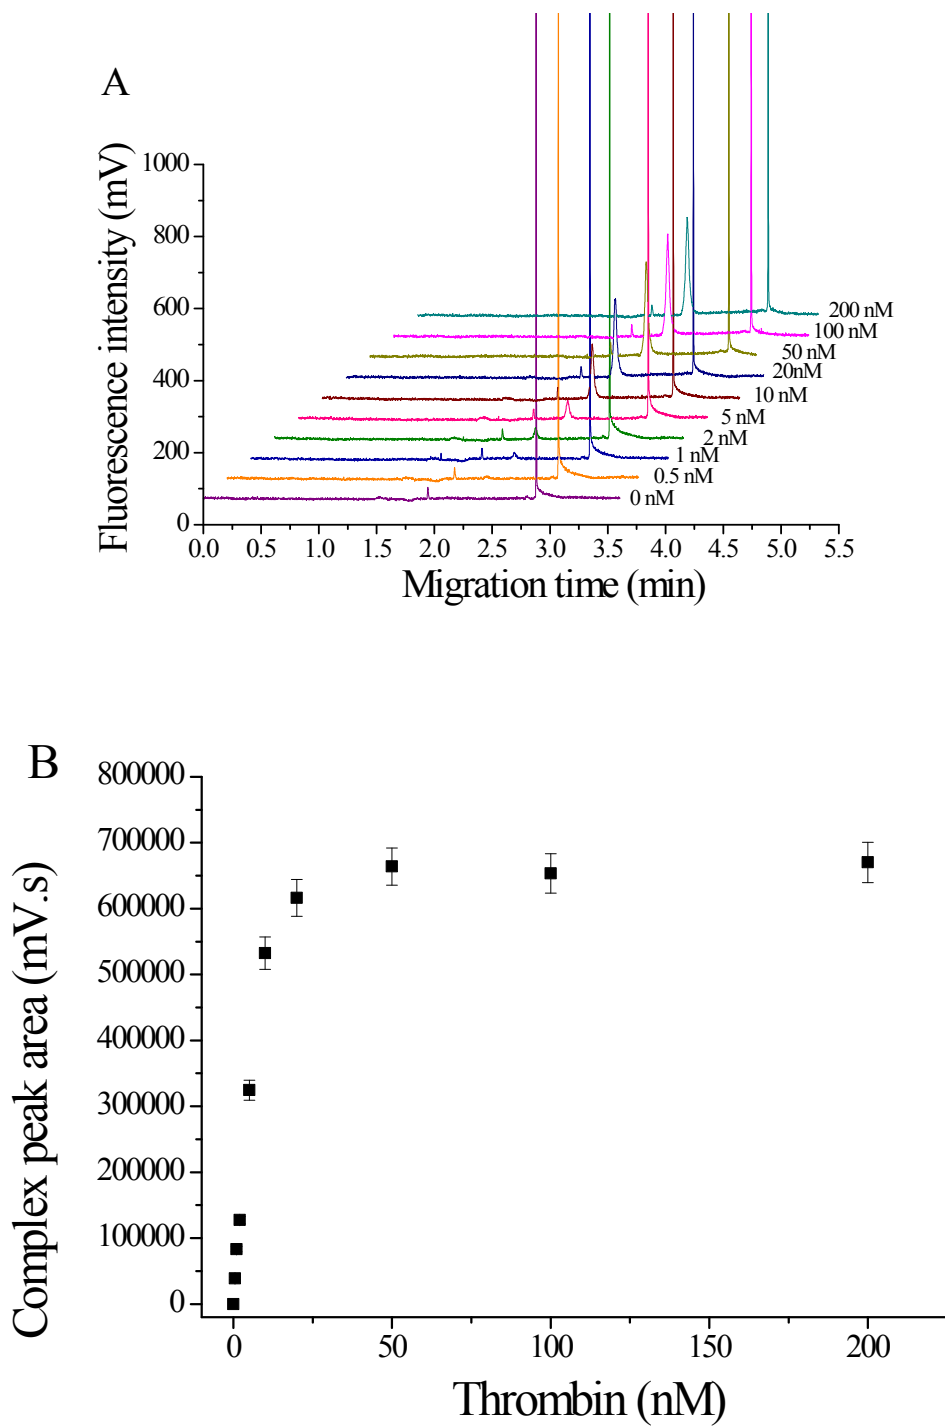

**Fig. S1** CE-LIF detection of varying concentrations of thrombin by Apt29-5'TMR (10 nM) in the sample buffer (10 mM Tris-HCl, pH 7.5) containing 1 mM MgCl<sub>2</sub>. (A) Electropherograms corresponding to varying concentrations of thrombin. The corresponding concentration of thrombin was indicated at traces. (B) Relationship between the peak area of the complex peak and the thrombin concentration.

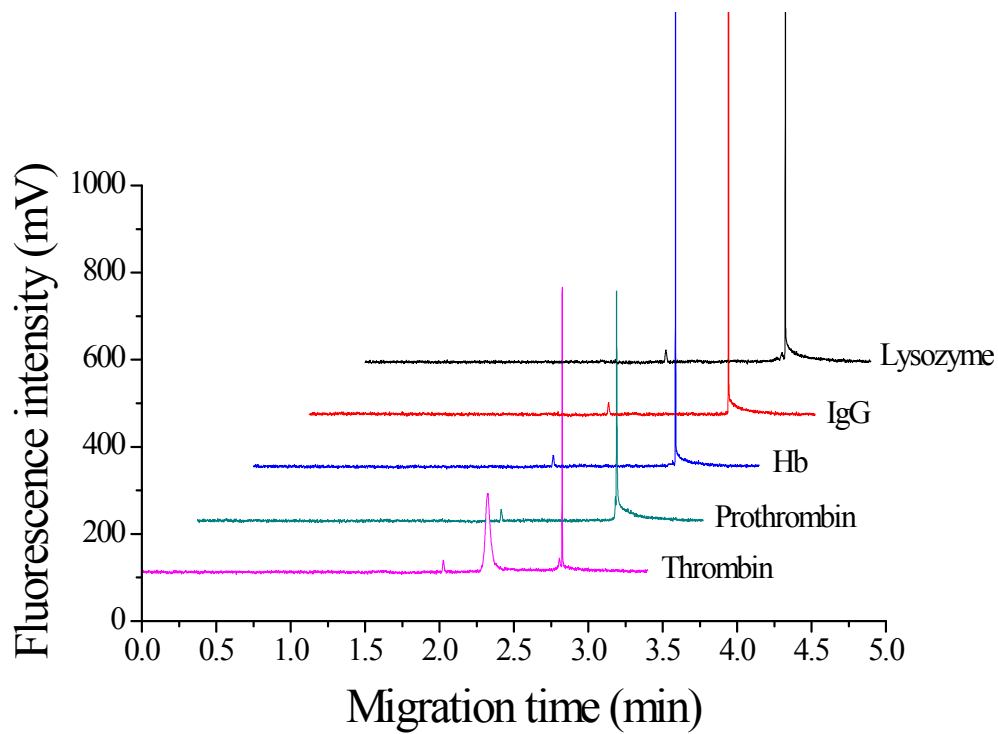

**Fig. S2** Specificity test of CE-LIF detection of thrombin by Apt29-5'TMR. 10 nM Apt29-5'TMR was applied, and 10 nM other proteins were tested.

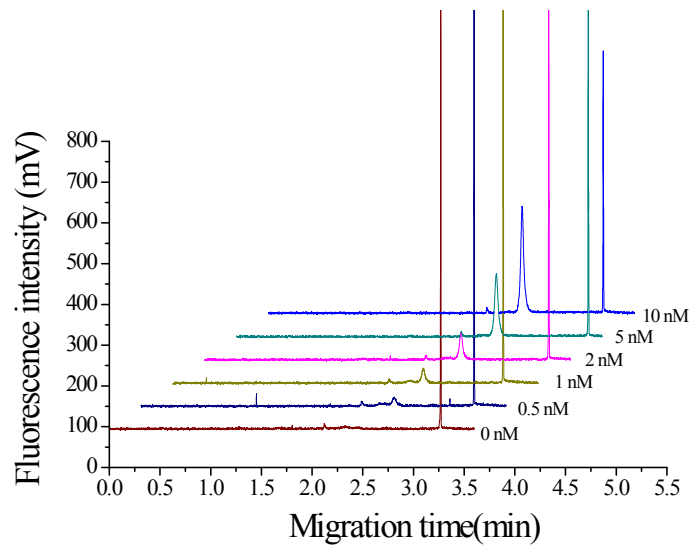

**Fig. S3** CE-LIF detection of varying concentrations of thrombin spiked in 2% human serum in sample buffer (10 mM Tris-HCl, pH 7.5) containing 1 mM MgCl<sub>2</sub> and 10 mM NaCl by Apt29-5'TMR. The corresponding concentration of thrombin was indicated at traces in the electrophoregrams.
